# Supplementary material for: Potential role of N6-adenine DNA methylation in alternative splicing and endosymbiosis in Paramecium bursaria
Source: PubMed Central journal article supplement — iScience. 2023 Apr 14;26(5):106676. doi: 10.1016/j.isci.2023.106676 (PMC10173741; doi:10.1016/j.isci.2023.106676), 2023-04-14
Supplement: mmc1.pdf [file mmc1.pdf]

iScience, Volume 26

## Supplemental information

### Potential role of N<sup>6</sup>-adenine DNA methylation in alternative splicing and endosymbiosis in *Paramecium bursaria*

Bo Pan, Fei Ye, Tao Li, Fan Wei, Alan Warren, Yuanyuan Wang, and Shan Gao

Supplemental figures S1-S9.

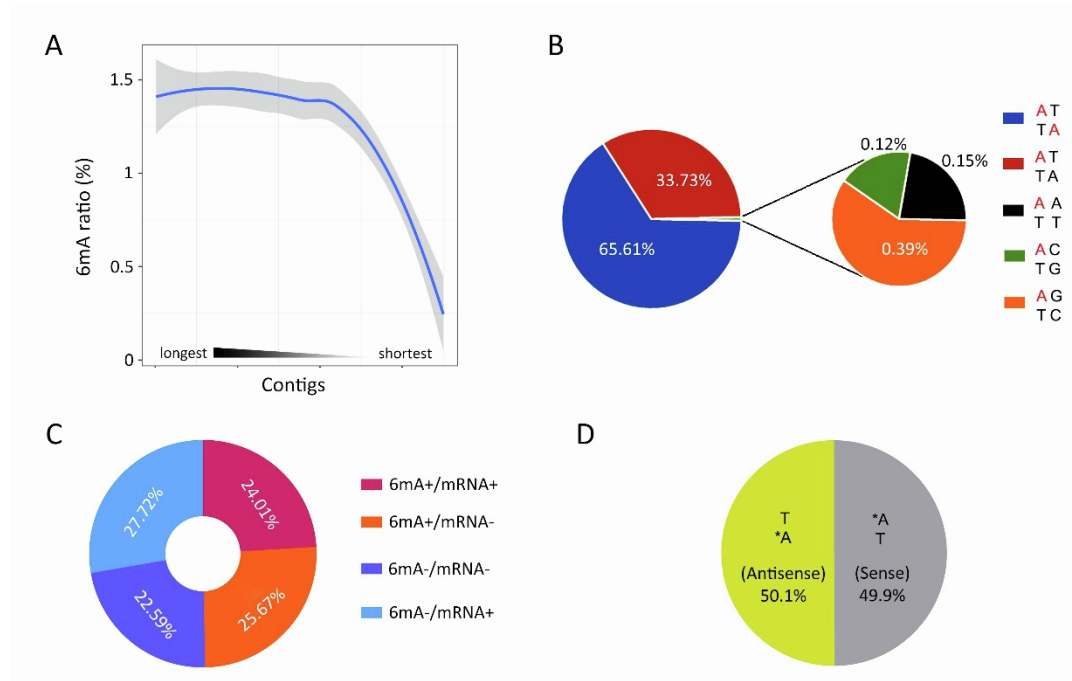

**Figure S1.** Genomic distribution of 6mA in *Paramecium bursaria*, related to Figure 1-2. (A) 6mA ratio (6mA/A) is plotted across the assembled MAC genome according to the contig length from long to short. (B) Distribution ratios of 6mA (marked by red) on various dinucleotide motifs across the genome. (C) Correlation between 6mA sites on DNA strands and transcription strands. (D) The ratios of 6mA on Watson or Crick strand, calculated by 6mA on a particular strand divided by 6mA on both strands.

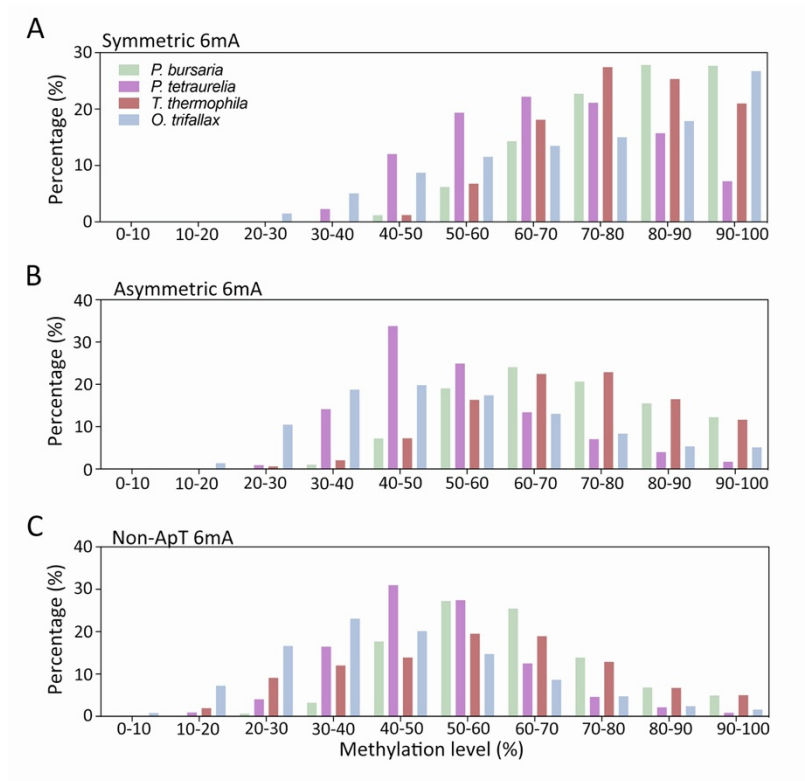

**Figure S2.** Methylation levels of 6mA in *P. bursaria* (green), *P. tetraurelia* (purple), *T. thermophila* (red) and *O. trifallax* (blue), related to Figure 2. 6mA is divided into symmetric (A), asymmetric (B) and non-ApT (C) 6mA. Methylation levels are ranked from low to high and divided into 10 quantiles. The percentage represents 6mA type/all 6mAs methylation.

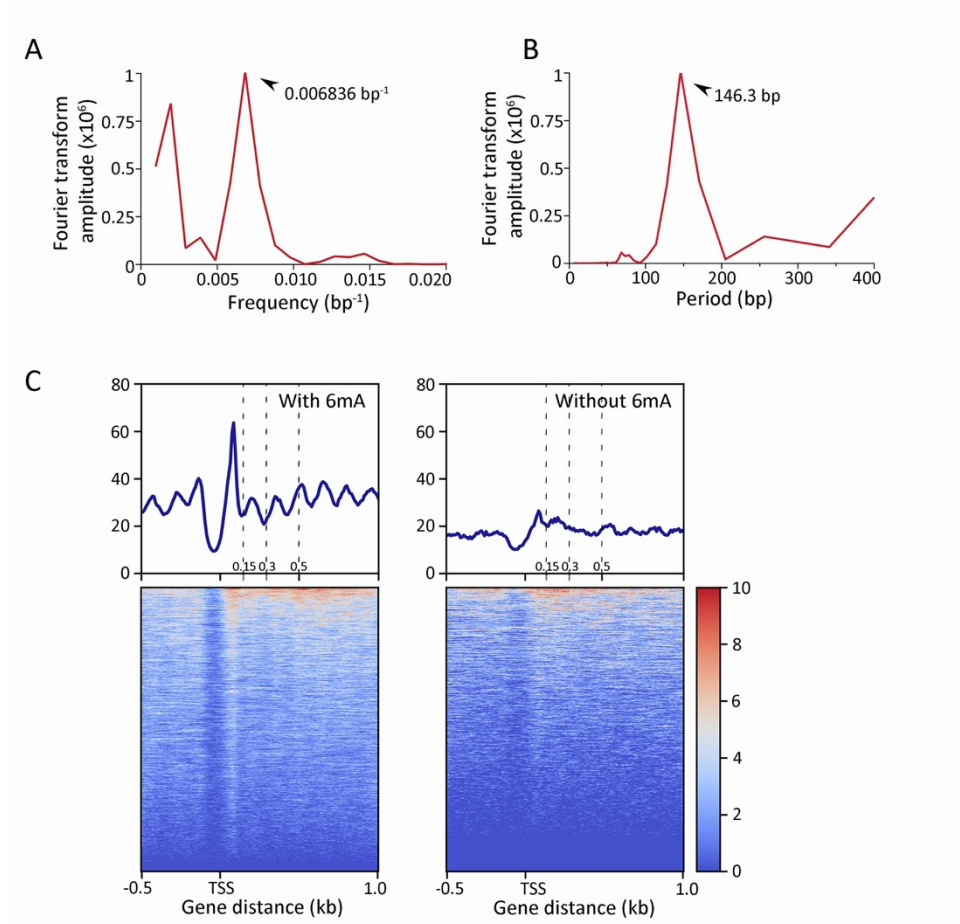

**Figure S3.** Fourier analysis of the periodic profile of downstream and upstream 6mA peaks, related to Figure 3. (A) Fourier transformation of 6mA distribution peaks. (B) Periods of the corresponding frequency in Fourier transformation. The dominant period length is 146.3 bp. (C) Nucleosomes present a more robust phase relative to TSS in genes with 6mA (left) than genes without 6mA (right). The plot was generated by deeptools with --MNase option. The locations of downstream TSS 150, 300 and 500bp were denoted by dashed lines, respectively.

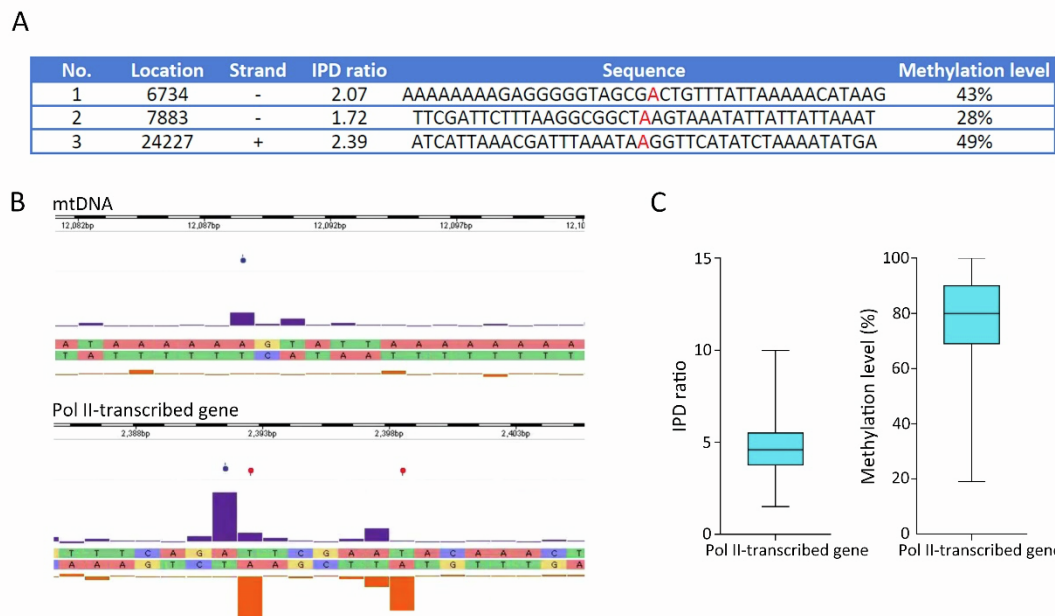

**Figure S4.** 6mA features in mtDNA of *P. bursaria*, related to Figure 3. (A) Detailed information of three high-confidence 6mA sites in mtDNA. (B) Comparison of representative kinetic signature performed by SMRT sequencing data of vegetative *P. bursaria* cells in mtDNA and Pol II-transcribed genes. Columns indicate the IPD peaks and balloons indicate the detected 6mA signals on both the sense (blue) and antisense (red) strands based on the IPD ratio. (C) The distribution of IPD ratio and 6mA methylation level of Pol II-transcribed genes. Data distributions are shown by boxplots.

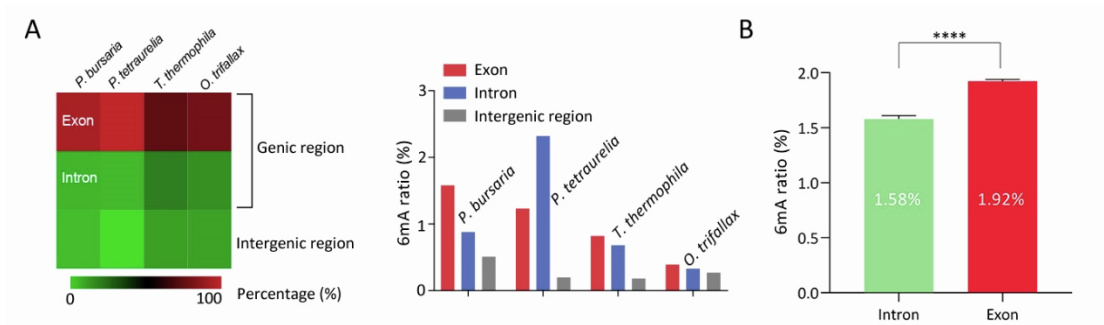

**Figure S5.** 6mA is preferentially located at exonic regions in *P. bursaria*, related to Figure 4. (A) Left: Heatmap of 6mA distribution on genomic features in *P. bursaria*, *P. tetraurelia*, *T. thermophila* and *O. trifallax*. Right: 6mA ratio (total 6mA sites number/ total A number of corresponding sequence) of exon, intron and intergenic region in three ciliates. (B) 6mA ratio (6mA sites number/ total A number of corresponding sequence) of individual intronic and exonic sequences in *P. bursaria*. Significant differences are labelled by \* (Student's *t*-test was performed). \*\*\*\*  $P < 0.0001$ ; \*\*\*  $P < 0.001$ ; \*\*  $P < 0.01$ ; \*  $P < 0.05$ ; ns: not significant,  $P > 0.05$ .

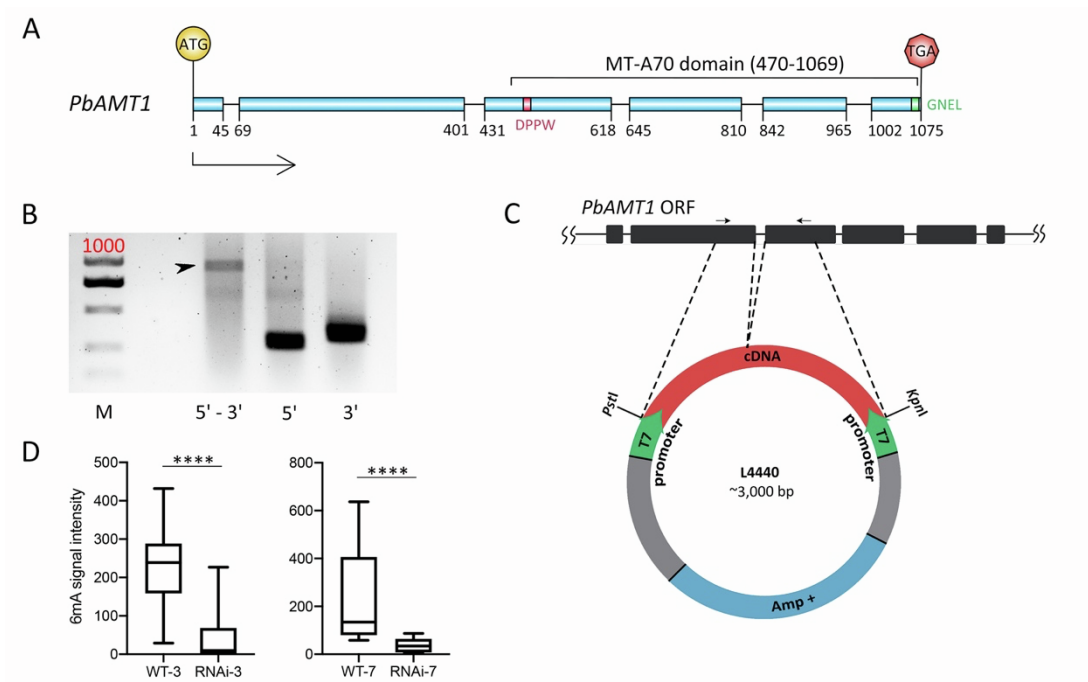

**Figure S6.** *PbAMT1* gene model detection and RNAi knockdown construct, related to Figure 6. (A) *PbAMT1* gene model is presented. MT-A70 region is delineated and DPPW motif and GNEL motif are highlighted by red and green, respectively. (B) RT-PCR assay using primers flanking *PbAMT1* gene body (lane M: marker; 5'-3': DNA fragment from ATG to TGA; lane 5': ~200 bp DNA fragment downstream of ATG; lane 3': ~400 bp DNA fragment upstream of TGA). (C) Schematic representation of the endogenous *PbAMT1* locus in the genome and the RNAi knockdown construct. (D) Statistical analysis of 6mA IF signal intensity in another replicate of RNAi experiment (3 days and 7days). Cell images were randomly selected and processed by ImageJ. Data are shown as box plots. Student's *t*-test was performed. \*\*\*\*  $P < 0.0001$ ; \*\*\*  $P < 0.001$ ; \*\*  $P < 0.01$ ; \*  $P < 0.05$ ; ns: not significant,  $P > 0.05$ .

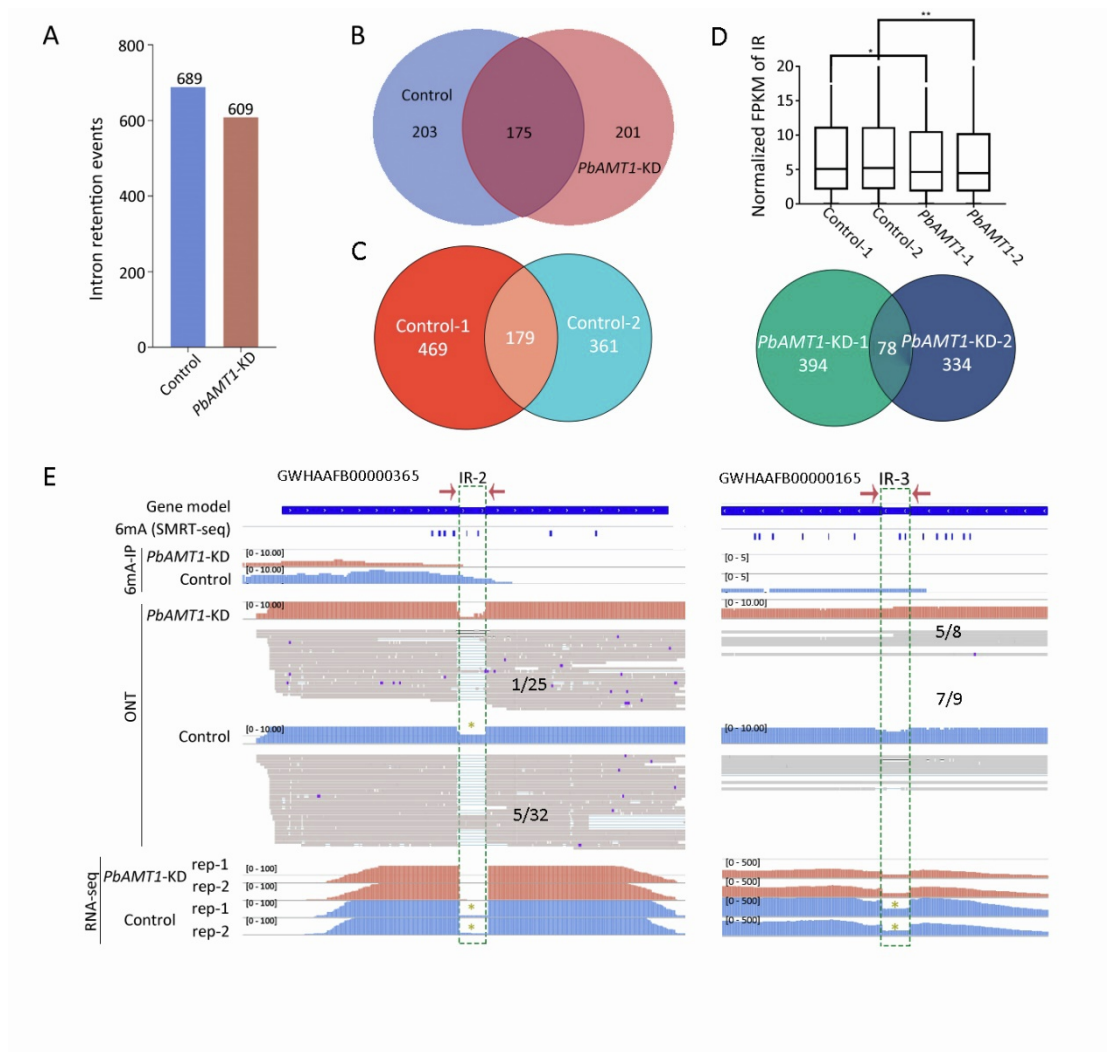

**Figure S7.** 6mA is associated with intron retention, related to Figure 6. (A) Intron retention events occurred in control and *PbAMT1*-KD cells by ONT cDNA-seq. (B) The overlap of genes harboring intron retention between control and *PbAMT1*-KD cells by ONT cDNA-seq. (C) The overlapped intron retention events between IR-2 control and *PbAMT1*-KD cells by RNA-seq with two replicates. (D) Intron retention (IR) events are reduced in *PbAMT1*-KD cells. Student's *t*-test was performed. \*\*\*\*  $P < 0.0001$ ; \*\*\*  $P < 0.001$ ; \*\*  $P < 0.01$ ; \*  $P < 0.05$ ; ns: not significant,  $P > 0.05$ . (E) Alternative splicing events and 6mA distribution on a representative gene locus IR-2 and IR-3 in control and *PbAMT1*-KD cells, respectively. The region of intron retention is highlighted by the dashed green box and the yellow asterisk. All the compared results are set the same data range.



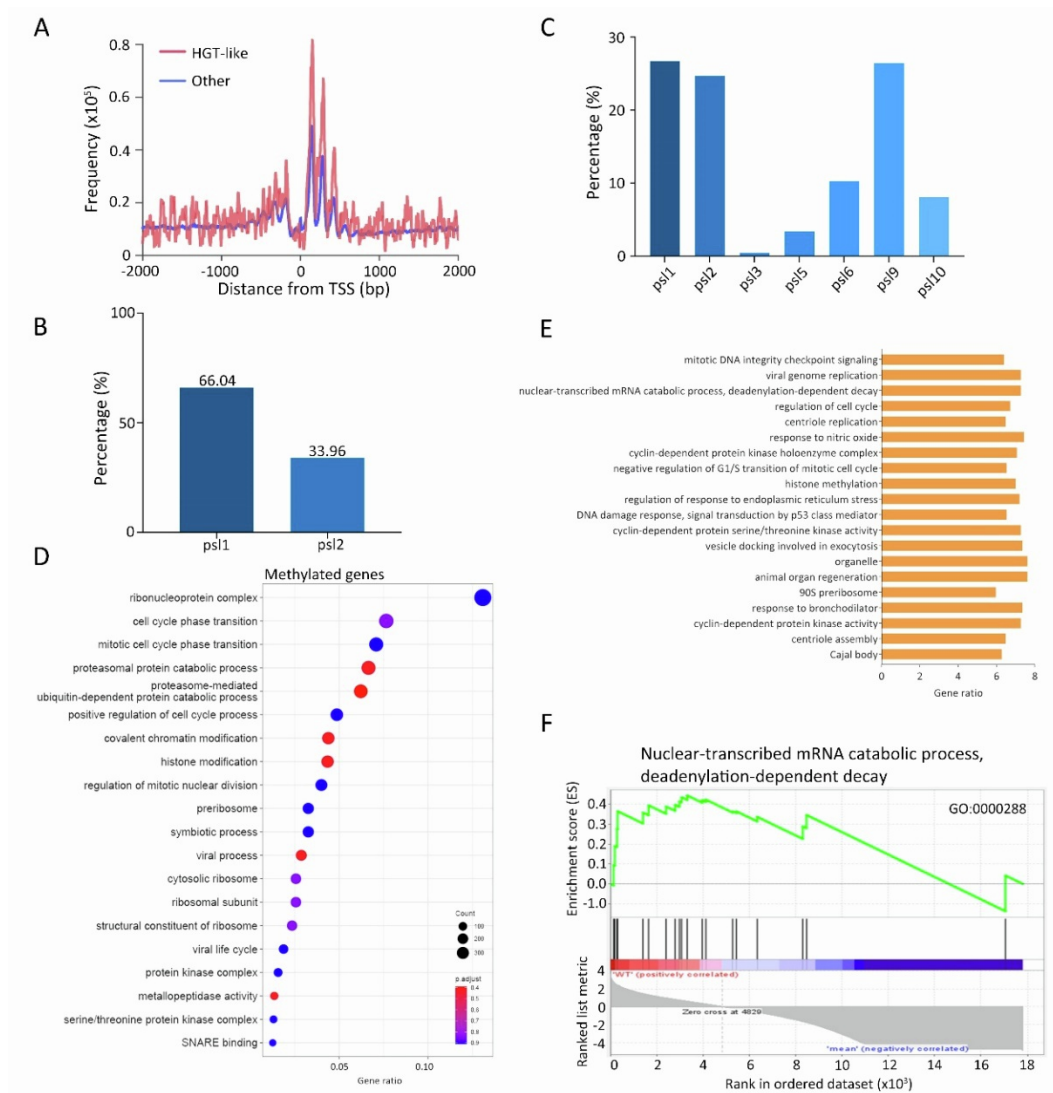

**Figure S8.** Endosymbiosis-correlated genes harbor lower 6mA levels but putative HGT-like genes from symbiotic algae have higher 6mA levels, related to Figure 7. (A) Distribution profiles of 6mA in HGT-like genes and other genes around transcription start sites (TSS) in *P. bursaria*. Note the higher 6mA level of HGT-like genes than other genes. (B) The percentage of gene number of different methylated HGT-like-gene age groups. (C) The percentage of gene number of different all-gene age groups. (D) Gene ontology enrichment analysis of methylated genes. The R package ggplot2 were performed. The dot size represents the gene number and the color bar shows the *P*-value. (E) Bar plot of enriched pathways of the top 20-ranked high 6mA-level genes. ~67% genes of *P. bursaria* are methylated, which were spread among the various pathways. (F) The GSEA analysis of genes bearing 6mA enriched in the nuclear-transcribed mRNA catabolic process, deadenylation-dependent decay pathways.

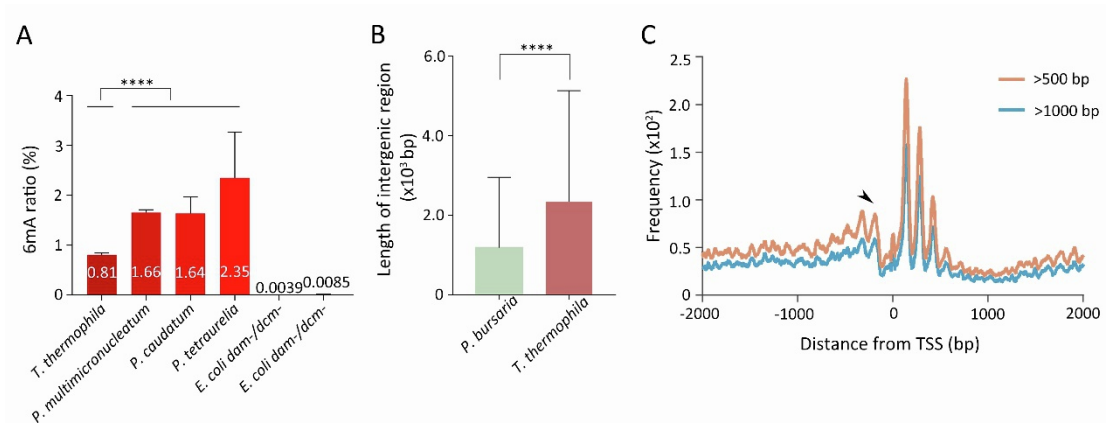

**Figure S9.** Unique features of 6mA in genus *Paramecium*, related to Figure 7. (A) Mass spectrometry analysis of 6mA, performed on three biological replicates for each species. Data are presented as bar plots. The strains used to detect are *T. thermophila* SB210 and *P. tetraurelia* 51. Other species of *Paramecium* genus which were detected by LC-MS are collected in wild environment by our lab mates. Student's *t*-test was performed. \*\*\*\*  $P < 0.0001$ ; \*\*\*  $P < 0.001$ ; \*\*  $P < 0.01$ ; \*  $P < 0.05$ ; ns: not significant,  $P > 0.05$ . (B) The distribution of length of intergenic region in *P. bursaria* (green) and *T. thermophila* (red). The y-axis represents the distance between genes. Student's *t*-test was performed. \*\*\*\*  $P < 0.0001$ ; \*\*\*  $P < 0.001$ ; \*\*  $P < 0.01$ ; \*  $P < 0.05$ ; ns: not significant,  $P > 0.05$ . (C) Distribution profiles of 6mA in the long-distanced genes (> 500 bp or > 1,000 bp) in *P. bursaria*.

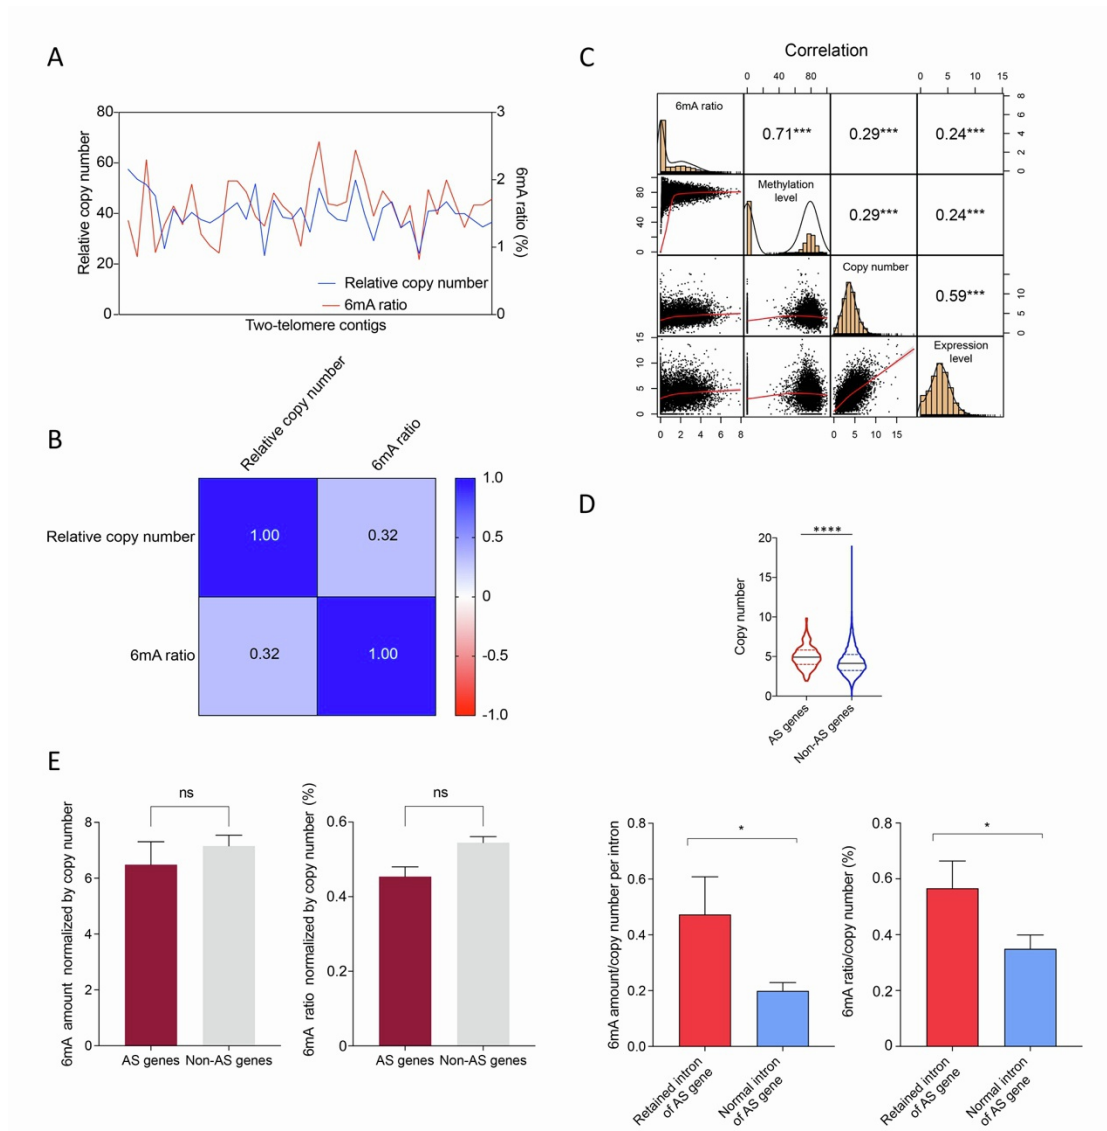

**Figure S10.** The relationship between 6mA and copy number, related to Figure 7. (A) Different chromosomes (two-telomere contigs) have different copy numbers and 6mA ratio. (B) A positive correlation between the copy number of two-telomere contigs/chromosomes and their 6mA ratio ( $r=0.32$ ). (C) Correlation analysis among 6mA ratio, methylation level, copy number and expression level (FPKM) for genes longer than 1kb. (D) The copy number variances between AS and non-AS genes. Student's *t*-test was performed. \*\*\*\*  $P < 0.0001$ ; \*\*\*  $P < 0.001$ ; \*\*  $P < 0.01$ ; \*  $P < 0.05$ ; ns: not significant,  $P > 0.05$ . (E) The differences of 6mA normalized by gene copy number in AS and non-AS genes, retained intron and normal intron of AS genes, respectively. Student's *t*-test was performed. \*\*\*\*  $P < 0.0001$ ; \*\*\*  $P < 0.001$ ; \*\*  $P < 0.01$ ; \*  $P < 0.05$ ; ns: not significant,  $P > 0.05$ .

**Table S1.** Detailed information of 6mA in *P. bursaria*, related to Figure 1-2.

|                   | Sites number        | Percentage (%) |
|-------------------|---------------------|----------------|
| 6mA sites         | 266,215             | -              |
| Symmetric         | 210,928 (105,464*2) | 79.23          |
| Asymmetric        | 54,230              | 20.37          |
| Non-ApT           | 1,057               | 0.40           |
| Intergenic        | 20,765              | 7.80           |
| Genic             | 245,450             | 92.20          |
| Exon              | 221,534             | 83.22          |
| Intron            | 23,916              | 8.98           |
| 6mA ratio (6mA/A) | -                   | 1.28           |

| SMRT-seq              | Coverage | Cut-off |
|-----------------------|----------|---------|
| <i>P. bursaria</i>    | 123×     | 30×     |
| <i>P. tetraurelia</i> | 400×     | 100×    |
| <i>T. thermophila</i> | 144×     | 36×     |
| <i>O. trifallax</i>   | 278×     | 70×     |

**Table S2.** Methylated adenines distributed on four forms of ApN dinucleotides in three ciliate species, related to Figure 2.

|                               | ApA        | ApT         | ApG        | ApC       | Species               |
|-------------------------------|------------|-------------|------------|-----------|-----------------------|
| Site numbers on genome        | 7,674,350  | 7,614,120   | 3,194,252  | 2,289,665 |                       |
| Number of methylated adenines | 239        | 265,158     | 627        | 191       | <i>P. bursaria</i>    |
| percentage (%)                | 0.003      | <b>3.48</b> | 0.02       | 0.01      |                       |
| -----                         |            |             |            |           |                       |
| Site numbers on genome        | 14,550,842 | 18,640,072  | 7,633,241  | 5,515,156 |                       |
| Number of methylated adenines | 432        | 545,844     | 1,222      | 362       | <i>P. tetraurelia</i> |
| percentage (%)                | 0.003      | <b>2.93</b> | 0.02       | 0.01      |                       |
| -----                         |            |             |            |           |                       |
| Site numbers on genome        | 35,375,906 | 27,831,470  | 10,116,164 | 6,973,798 |                       |
| Number of methylated adenines | 27,251     | 382,863     | 15,840     | 10,322    | <i>T. thermophila</i> |
| percentage (%)                | 0.08       | <b>1.38</b> | 0.16       | 0.15      |                       |
| -----                         |            |             |            |           |                       |
| Site numbers on genome        | 17,265,715 | 14,632,462  | 8,342,515  | 5,769,414 |                       |
| Number of methylated adenines | 2,190      | 166,145     | 2,941      | 1,182     | <i>O. trifallax</i>   |
| percentage (%)                | 0.01       | <b>1.14</b> | 0.04       | 0.02      |                       |

**Table S3.** Comparison of 6mA in different categories in three ciliates, related to Figure 2.

|                | <i>P. bursaria</i> | <i>P. tetraurelia</i> | <i>T. thermophila</i> | <i>O. trifallax</i> |
|----------------|--------------------|-----------------------|-----------------------|---------------------|
| Symmetric (%)  | 79.23              | 80.86                 | 61.06                 | 81.27               |
| Asymmetric (%) | 20.37              | 18.77                 | 26.70                 | 14.71               |
| Non-ApT (%)    | 0.40               | 0.37                  | 12.24                 | 4.02                |

**Table S4.** Comparison of 6mA methylation levels in *P. bursaria*, related to Figure 2.

| Quantiles<br>(Methylation level) | Sites number | Percentage (%) |
|----------------------------------|--------------|----------------|
| 0-10%                            | 0            | 0              |
| 10-20%                           | 2            | 0.001          |
| 20-30%                           | 65           | 0.02           |
| 30-40%                           | 726          | 0.27           |
| 40-50%                           | 6,595        | 2.48           |
| 50-60%                           | 23,700       | 8.90           |
| 60-70%                           | 43,504       | 16.34          |
| 70-80%                           | 59,314       | 22.28          |
| 80-90%                           | 67,201       | 25.24          |
| 90-100%                          | 65,108       | 24.46          |

**Table S5.** Pol I- and Pol III-transcribed genes of *P. bursaria*, related to Figure 3.

| Contig          | Source   | Begin  | End    | Type     | RNA polymerases |
|-----------------|----------|--------|--------|----------|-----------------|
| GWHAAFB00000380 | RNAmmer  | 11822  | 15403  | 28S rRNA | Pol I           |
| GWHAAFB00000380 | RNAmmer  | 2856   | 6437   | 28S rRNA | Pol I           |
| GWHAAFB00000380 | RNAmmer  | 20451  | 24028  | 28S rRNA | Pol I           |
| GWHAAFB00000072 | RNAmmer  | 156482 | 156596 | 5S rRNA  | Pol III         |
| GWHAAFB00000074 | RNAmmer  | 35575  | 35689  | 5S rRNA  | Pol III         |
| GWHAAFB00000072 | RNAmmer  | 158302 | 158416 | 5S rRNA  | Pol III         |
| GWHAAFB00000074 | RNAmmer  | 33780  | 33894  | 5S rRNA  | Pol III         |
| GWHAAFB00000072 | RNAmmer  | 160099 | 160213 | 5S rRNA  | Pol III         |
| GWHAAFB00000052 | RNAmmer  | 90916  | 91030  | 5S rRNA  | Pol III         |
| GWHAAFB00000074 | RNAmmer  | 30903  | 31017  | 5S rRNA  | Pol III         |
| GWHAAFB00000072 | RNAmmer  | 153565 | 153679 | 5S rRNA  | Pol III         |
| GWHAAFB00000380 | RNAmmer  | 984    | 2709   | 18S rRNA | Pol I           |
| GWHAAFB00000380 | RNAmmer  | 18579  | 20304  | 18S rRNA | Pol I           |
| GWHAAFB00000380 | RNAmmer  | 9950   | 11675  | 18S rRNA | Pol I           |
| GWHAAFB00000001 | tRNAscan | 1861   | 1941   | tRNA     | Pol III         |
| GWHAAFB00000001 | tRNAscan | 40347  | 40276  | tRNA     | Pol III         |
| GWHAAFB00000001 | tRNAscan | 25403  | 25333  | tRNA     | Pol III         |
| GWHAAFB00000001 | tRNAscan | 5632   | 5552   | tRNA     | Pol III         |
| GWHAAFB00000002 | tRNAscan | 241346 | 241274 | tRNA     | Pol III         |
| GWHAAFB00000003 | tRNAscan | 165448 | 165377 | tRNA     | Pol III         |
| GWHAAFB00000003 | tRNAscan | 164748 | 164678 | tRNA     | Pol III         |
| GWHAAFB00000003 | tRNAscan | 164447 | 164376 | tRNA     | Pol III         |
| GWHAAFB00000011 | tRNAscan | 64240  | 64168  | tRNA     | Pol III         |
| GWHAAFB00000011 | tRNAscan | 63972  | 63900  | tRNA     | Pol III         |
| GWHAAFB00000011 | tRNAscan | 63704  | 63632  | tRNA     | Pol III         |
| GWHAAFB00000012 | tRNAscan | 87431  | 87503  | tRNA     | Pol III         |
| GWHAAFB00000012 | tRNAscan | 115565 | 115647 | tRNA     | Pol III         |
| GWHAAFB00000015 | tRNAscan | 16719  | 16637  | tRNA     | Pol III         |
| GWHAAFB00000017 | tRNAscan | 44377  | 44297  | tRNA     | Pol III         |
| GWHAAFB00000027 | tRNAscan | 7134   | 7206   | tRNA     | Pol III         |
| GWHAAFB00000027 | tRNAscan | 7542   | 7613   | tRNA     | Pol III         |
| GWHAAFB00000039 | tRNAscan | 5947   | 5867   | tRNA     | Pol III         |
| GWHAAFB00000045 | tRNAscan | 7923   | 7853   | tRNA     | Pol III         |
| GWHAAFB00000050 | tRNAscan | 97471  | 97391  | tRNA     | Pol III         |
| GWHAAFB00000050 | tRNAscan | 97310  | 97239  | tRNA     | Pol III         |
| GWHAAFB00000050 | tRNAscan | 96945  | 96864  | tRNA     | Pol III         |
| GWHAAFB00000057 | tRNAscan | 118002 | 117931 | tRNA     | Pol III         |
| GWHAAFB00000057 | tRNAscan | 117838 | 117766 | tRNA     | Pol III         |
| GWHAAFB00000057 | tRNAscan | 117546 | 117475 | tRNA     | Pol III         |
| GWHAAFB00000059 | tRNAscan | 24240  | 24320  | tRNA     | Pol III         |



|                 |          |        |        |      |         |
|-----------------|----------|--------|--------|------|---------|
| GWHAAFB00000059 | tRNAscan | 24411  | 24491  | tRNA | Pol III |
| GWHAAFB00000060 | tRNAscan | 53584  | 53655  | tRNA | Pol III |
| GWHAAFB00000060 | tRNAscan | 53736  | 53806  | tRNA | Pol III |
| GWHAAFB00000060 | tRNAscan | 54077  | 54147  | tRNA | Pol III |
| GWHAAFB00000072 | tRNAscan | 44775  | 44847  | tRNA | Pol III |
| GWHAAFB00000072 | tRNAscan | 45044  | 45116  | tRNA | Pol III |
| GWHAAFB00000077 | tRNAscan | 14056  | 13985  | tRNA | Pol III |
| GWHAAFB00000081 | tRNAscan | 87782  | 87711  | tRNA | Pol III |
| GWHAAFB00000086 | tRNAscan | 108650 | 108732 | tRNA | Pol III |
| GWHAAFB00000091 | tRNAscan | 58875  | 58945  | tRNA | Pol III |
| GWHAAFB00000096 | tRNAscan | 29092  | 29008  | tRNA | Pol III |
| GWHAAFB00000096 | tRNAscan | 28850  | 28766  | tRNA | Pol III |
| GWHAAFB00000096 | tRNAscan | 28442  | 28371  | tRNA | Pol III |
| GWHAAFB00000096 | tRNAscan | 28118  | 28045  | tRNA | Pol III |
| GWHAAFB00000120 | tRNAscan | 15552  | 15623  | tRNA | Pol III |
| GWHAAFB00000120 | tRNAscan | 15814  | 15886  | tRNA | Pol III |
| GWHAAFB00000124 | tRNAscan | 99067  | 98996  | tRNA | Pol III |
| GWHAAFB00000126 | tRNAscan | 89709  | 89638  | tRNA | Pol III |
| GWHAAFB00000128 | tRNAscan | 74294  | 74366  | tRNA | Pol III |
| GWHAAFB00000130 | tRNAscan | 14792  | 14865  | tRNA | Pol III |
| GWHAAFB00000136 | tRNAscan | 46608  | 46535  | tRNA | Pol III |
| GWHAAFB00000147 | tRNAscan | 17925  | 17997  | tRNA | Pol III |
| GWHAAFB00000147 | tRNAscan | 21255  | 21327  | tRNA | Pol III |
| GWHAAFB00000152 | tRNAscan | 55529  | 55458  | tRNA | Pol III |
| GWHAAFB00000152 | tRNAscan | 55328  | 55257  | tRNA | Pol III |
| GWHAAFB00000152 | tRNAscan | 55164  | 55094  | tRNA | Pol III |
| GWHAAFB00000152 | tRNAscan | 23605  | 23534  | tRNA | Pol III |
| GWHAAFB00000152 | tRNAscan | 23346  | 23274  | tRNA | Pol III |
| GWHAAFB00000155 | tRNAscan | 98579  | 98658  | tRNA | Pol III |
| GWHAAFB00000158 | tRNAscan | 90146  | 90073  | tRNA | Pol III |
| GWHAAFB00000158 | tRNAscan | 89961  | 89891  | tRNA | Pol III |
| GWHAAFB00000183 | tRNAscan | 16159  | 16230  | tRNA | Pol III |
| GWHAAFB00000183 | tRNAscan | 16361  | 16432  | tRNA | Pol III |
| GWHAAFB00000183 | tRNAscan | 16525  | 16596  | tRNA | Pol III |
| GWHAAFB00000187 | tRNAscan | 44338  | 44411  | tRNA | Pol III |
| GWHAAFB00000190 | tRNAscan | 46780  | 46707  | tRNA | Pol III |
| GWHAAFB00000205 | tRNAscan | 62948  | 62877  | tRNA | Pol III |
| GWHAAFB00000217 | tRNAscan | 22894  | 22964  | tRNA | Pol III |
| GWHAAFB00000223 | tRNAscan | 30029  | 30102  | tRNA | Pol III |
| GWHAAFB00000223 | tRNAscan | 10822  | 10750  | tRNA | Pol III |
| GWHAAFB00000233 | tRNAscan | 2660   | 2731   | tRNA | Pol III |
| GWHAAFB00000233 | tRNAscan | 2829   | 2899   | tRNA | Pol III |
| GWHAAFB00000233 | tRNAscan | 25125  | 25054  | tRNA | Pol III |

|                 |          |        |        |      |         |
|-----------------|----------|--------|--------|------|---------|
| GWHAAFB00000238 | tRNAscan | 15613  | 15540  | tRNA | Pol III |
| GWHAAFB00000244 | tRNAscan | 6607   | 6537   | tRNA | Pol III |
| GWHAAFB00000252 | tRNAscan | 24168  | 24096  | tRNA | Pol III |
| GWHAAFB00000257 | tRNAscan | 50653  | 50582  | tRNA | Pol III |
| GWHAAFB00000275 | tRNAscan | 1776   | 1703   | tRNA | Pol III |
| GWHAAFB00000301 | tRNAscan | 14317  | 14237  | tRNA | Pol III |
| GWHAAFB00000315 | tRNAscan | 16928  | 16845  | tRNA | Pol III |
| GWHAAFB00000315 | tRNAscan | 16673  | 16600  | tRNA | Pol III |
| GWHAAFB00000315 | tRNAscan | 16472  | 16399  | tRNA | Pol III |
| GWHAAFB00000324 | tRNAscan | 18670  | 18600  | tRNA | Pol III |
| GWHAAFB00000329 | tRNAscan | 7897   | 7825   | tRNA | Pol III |
| GWHAAFB00000346 | tRNAscan | 38412  | 38325  | tRNA | Pol III |
| GWHAAFB00000348 | tRNAscan | 31827  | 31756  | tRNA | Pol III |
| GWHAAFB00000393 | tRNAscan | 53606  | 53686  | tRNA | Pol III |
| GWHAAFB00000393 | tRNAscan | 107983 | 108055 | tRNA | Pol III |

---

**Table S6.** Comparison of 6mA distribution on different genomic features in three ciliates, related to Figure 4.

|            | <i>P. bursaria</i> | <i>P. tetraurelia</i> | <i>T. thermophila</i> | <i>O. trifallax</i> |
|------------|--------------------|-----------------------|-----------------------|---------------------|
| Intergenic | 7.80%              | 3.09%                 | 13.45%                | 12.87%              |
| Genic      | 92.20%             | 96.91%                | 86.55%                | 87.13%              |
| Exon       | 83.22%             | 88.64%                | 65.98%                | 70.63%              |
| Intron     | 8.98%              | 8.27%                 | 20.58%                | 16.50%              |

**Table S7.** Sequence of *PbAMT1* in *P. bursaria*, related to Figure 5.

**>Protein sequence**

MISKQKGNKKSIIEDDQIQKKVKLDDDQSVSQILEEEDIDSEEIEGLDVSEEEKEPIE  
DNNYIFIDKLPNQETALLKFQEQVRNRIKFYKQRYLQECYENQTKKSFVNDDAIPICA  
DVRYLDFQKLHDSQLQIAGRLFDVIMM**DPPW**QLSSSQPSRGVAIAYQSLSDDMISKM  
PIQSLQDDGIILWTINAKYKVTCKLMENWGYKIVDEIVVVKKTVNGKIAKGHGFYL  
QHAKENCLVGVKGNLDWERCKKSVASDVIFSERRGQSQKPEEIKYVEELIPNGHYL  
EIFGRRNNIRKNWVTI**GNEL**

**>Gene (introns were labelled by orange)**

ATGATCTCCAAACAAAAGGGAAACAAAAAATCGAAAATAATAGAG**GTATTGAGCA**  
**TGAATATAGGAAG**GATGAGGATTAGATATAAAAAAAGTAAAGCTAGACGATGACT  
AAAGTGTATCCTAAATCCTTGAAGAGGAGGATATCGACTCTGAAGAAATTGAAGG  
ATTGGATGTATCGGAGGAAGAAAAGAGCCGATCGAAGACAATAATTATATCTTTA  
TAGACAAATTACCTAATCAAGAGACAGCCTTATTAATAATTCAGGAATAGGTCAGG  
AATAGAATTAAGTTTTACAAACAACGATATCTCTAGGAGTGCTATGAGAATTAGAC  
GAAAAAAGTTTTGTAAATGATGATGCTATACCAATTTGTGCTGATGTTAGATATCT  
TGACTTTTA**GTATTTTAATTA**AAAAA**AAATATCAAG**AAATTACATGATTCACAA  
CTTCAAATAGCTGGAAGGCTTTTTGATGTTATTATGATGGACCCCTCCATGGTAACTC  
TCAAGTTCATAACCATCTAGAGGTGTTGCTATTGCTTATTAATCTTTATCAGACGATA  
TGATAAGTAAAATGCCCATTTAATCATTATAGGATGATGGAATCATTCTCATATG**GTA**  
**ATATTATATTCATAATTC**AATAGGACTATCAATGCAAAATATAAGGTAACCTTGCAAGC  
TAATGGAAAATTGGGGATATAAAATTGTTGATGAAATTGTGTGGGTTAAGAAGACT  
GTGAATGGTAAAATAGCAAAAGGACATGGATTTTATTTATAACATGCTAAAGAAAA  
TTGCTTAGTAGGCGTTAAG**GTATGATCAATAGAAAATTTTAAAATTTTAG**GGCAATT  
TGGATTGGGAAAGATGCAAAAAATCGGTAGCGAGTGATGTTATCTTCAGCGAACG  
AAGAGGATAATCATAGAAACCTGAAGAAATTTATAAATATGTAGAAGAACTAATTC  
CAAATG**GTATTTTATATTTT**TA**AAAAAACCTCTTATTTTAG**GGCATTATTTGGAAAT  
ATTCGGAAGAAGAAATAATATCAGGAAAAATTTGGGTTACAATAGGAAATGAATTGT  
GA

**>CDS**

ATGATCTCCAAACAAAAGGGAAACAAAAAATCGAAAATAATAGAGGATGAGGATT  
AGATATAAAAAAAGTAAAGCTAGACGATGACTAAAGTGTATCCTAAATCCTTGAA  
GAGGAGGATATCGACTCTGAAGAAATTGAAGGATTGGATGTATCGGAGGAAGAAA  
AAGAGCCGATCGAAGACAATAATTATATCTTTATAGACAAATTACCTAATCAAGAGA  
CAGCCTTATTAATAATTCAGGAATAGGTCAGGAATAGAATTAAGTTTTACAAACAA  
CGATATCTCTAGGAGTGCTATGAGAATTAGACGAAAAAAGTTTTGTAAATGATGA  
TGCTATACCAATTTGTGCTGATGTTAGATATCTTGACTTTTAAAATACATGATTCA  
CAACTTCAAATAGCTGGAAGGCTTTTTGATGTTATTATGATGGACCCCTCCATGGTAA  
CTCTCAAGTTCATAACCATCTAGAGGTGTTGCTATTGCTTATTAATCTTTATCAGACG  
ATATGATAAGTAAAATGCCCATTTAATCATTATAGGATGATGGAATCATTCTCATATG

GACTATCAATGCAAAATATAAGGTAACCTTGCAAGCTAATGGAAAATTGGGGATATA  
AAATTGTTGATGAAATTGTGTGGGTAAAGAAGACTGTGAATGGTAAAATAGCAAA  
AGGACATGGATTTTATTTATAACATGCTAAAGAAAATTGCTTAGTAGGCGTTAAGGG  
CAATTTGGATTGGGAAAGATGCAAAAAATCGGTAGCGAGTGATGTTATCTTCAGCG  
AACGAAGAGGATAATCATAGAAACCTGAAGAAATTTATAAATATGTAGAAGAACTA  
ATTCCAAATGGGCATTATTTGGAAATATTCGGAAGAAGAAATAATATCAGGAAAAA  
TTGGGTACAATAGGAAATGAATTGTGA

**Table S8.** Sequence of PbAMTs 2-6 in *P. bursaria*, related to Figure 5.

>PbAMT2

MPLVLEDQVSVQLQYQKDNQIRELLMYHQQNQKQKINFLCQQQYQTSQYSMPYFR  
APIASDFETPPLLLAYRSTLFPKTLTYISVFSFSVIQCSIFSINVYRFETLFIHNALKYHQ  
TYRQQQLLLGKIQRRLVLFYVYQVFPSTLSYIMYHRPCILQSLQIYFQYFRNFKYYLPS  
KNVDFPTDFSPCLKKKSFLKHHTQKHDPKFEVIVFGFHFXXXXXXXXXXXXXSVQKEN  
VYAFEILQRHQNKKNKFFMSEADQQLRKKENMKTVFNQIDLNLVFOKRERKQVGG  
QTQIPQPVVKKTVVSKPKSTVKVQKAPQTERVQNEEPQYKQPVMESESEFDPKER  
SKKLGKGFRRTHHKFKENDSSDEEYKHLILKRVNKFKKSYEQKQVLHTGSEQD  
ILVRNLFKNLYEKIFQDLKIIQENSTEEIQGDNEKRILPEECTDMETRNLKLLGVDNA  
EYYSKLTDVKTYINCDIRYFNLDLVEKVGSGFDGGQNDSSFMFTNSKFQLDYNTMS  
NQEIMDIKIEKLSKKGFLFLWILNTQITIASSEMVNKWGYEIVDQIVWVKLNAQGNNIY  
LSTGYYFMHSYEMCLVGYKCPQGDHVEYHYSKVSNNIIFSPVRNKSQKPLELYEIIELM  
MPGAKRLEIFARNHNLRHGWFSIGNQLGETYQKWHIQINCNSCPTSLQPGIARFKSKR  
VANFDICQKCYEEKLQGGFTENDFFHLANKADEEVLHQYHQCNICEQEPIWGTRFE  
CVTCENYDLCEACFDHTLTQEEQQHKDHDFAIELPIFAQGIPCHDAKCNSCFQKPIL  
GVKIAFSLVTQPNQPVKDINLIEWNLSMSHKTXXXXXXXXXXXXXXXXXXQGCIEVS  
GGIYKENCFCGFYFCDQCHALKKDDWKCYVATSHKNYHTFIKIQ

>PbAMT3

MNQKLPDLCMNFINMNERPQNFVKKYKPEERFEDYPKAKELIRLKSELIKRNHPPA  
YLKEDLRSFDLTKLGKFDVILIDPPWAEYTRRFLQANMQVKEHQQSWSLDELKSLQIE  
KLADIPSFLFLWCGSEHLDDGRELFKHWGYKRCEDIVWLKTNRDISKQNQYVAGHD  
YGDNLRRVKEHCLVGLKGDVKRASDQHFHIANIDTDVLISEEEAMGSTKKPEELYD  
VIERFCLGRRRLELFGEIHNIREGWYQIFQLKRLTIGSQLRDSRFSLQEYQSYFVQDRF  
NEEKPFVGPKFIESTPEIENLRPKSPSKEQQQQQQQFSFSFGQM

>PbAMT4

MKYKNKKERSRSREQEKLDPKYPINQDQFRAVVIDYLMSDQFDYPISGNELYHCIN  
SAFLSRQNTPYLRNLQIEPILKQLADTSAIQLSKLAVGTQLQDFILSISLEKLLQLNQY  
SKDRPKKAPTVEEWINEEIRQIAYGQTFQRIDHLLDEARNQKQNVSLPKIAAQKKR  
MLENIGNISLKYEDNVVQLALERKRAALLKTENYDEEEARRKLNERRGLVICEYCSR  
RCRNVSCQKTHFRKIVKANTQTKLGNCSNLDQCPEQETCKYIHYILDGNDHDWQKRI  
KRSIPPQWINDLRFDFRVLGKFDVIMADPPWDIHMNLPYGLTKDKEMKALRVDLL  
QDDGMIFLWVTGRAMELGRECLSLWGYRRVEELVWIKVNMHRIIRTGRTGHWLNH  
SKEHCLVGIKGNPSIIKALDCDVIVSEVRETSRKPDEIYGLIQRMCNPKKIELFGRPHN  
CRENWITLGNQLPGVFIKDETILSRFAEAYPQVDISENSMNTNQQQMSNQENLNVIYN  
NHIGKKE

>PbAMT6

MVLEYRQNPKYQPQIAELAPEQYKYAIQQFSIVKQANPLEAQSPDIQALFINIKWNHE  
QGATIQEFVKIHQQMVIPESMMSNGILFIWCDKDNIMEIIDHLDSQGFNYVENF  
TMVILSREKILTMNDKTKKITDFFTKKEKQKLNQELQSDLPDLPSTVFWNQ  
DQQYFRKAKRLLMFRKISKQNLRLRHQRTGDIFFDVDDPQGISDIGLEYVYKMIET  
LLPKAKYSNGEQLKMMELFADPKSTGRLGWVQVIKE

**Table S9.** The adjusted *P*-value of Tukey's multiple comparisons test of gene methylation level among the gene age groups, related to Figure 7.

|       | psl1     | psl2   | psl3    | psl5    | psl6   | psl9 | psl10 |
|-------|----------|--------|---------|---------|--------|------|-------|
| psl1  | -        |        |         |         |        |      |       |
| psl2  | ****     | -      |         |         |        |      |       |
| psl3  | 0.6163   | 0.9869 | -       |         |        |      |       |
| psl5  | 0.0071** | 0.9093 | >0.9999 | -       |        |      |       |
| psl6  | ****     | ****   | 0.9975  | 0.3099  | -      |      |       |
| psl9  | ****     | ****   | 0.9556  | 0.0108* | 0.6351 | -    |       |
| psl10 | ****     | ****   | 0.0641  | ****    | ****   | **** | -     |

PSL: Phylostratigraphic level. \*\*\*\*  $P < 0.0001$ ; \*\*\*  $P < 0.001$ ; \*\*  $P < 0.01$ ; \*  $P < 0.05$ .

**Table S10.** The adjusted *P*-value of Tukey's multiple comparisons test of expression level among the gene age groups, related to Figure 7.

|       | psl1    | psl2   | psl3    | psl5   | psl6      | psl9   | psl10 |
|-------|---------|--------|---------|--------|-----------|--------|-------|
| psl1  | -       |        |         |        |           |        |       |
| psl2  | ****    | -      |         |        |           |        |       |
| psl3  | 0.8334  | 0.9991 | -       |        |           |        |       |
| psl5  | 0.0263* | 0.9676 | >0.9999 | -      |           |        |       |
| psl6  | 0.7657  | 0.4156 | 0.9613  | 0.3843 | -         |        |       |
| psl9  | ****    | 0.0654 | >0.9999 | 0.9994 | 0.0006*** | -      |       |
| psl10 | ****    | 0.1784 | >0.9999 | 0.9925 | 0.0042**  | 0.9991 | -     |

PSL: Phylostratigraphic level. \*\*\*\*  $P < 0.0001$ ; \*\*\*  $P < 0.001$ ; \*\*  $P < 0.01$ ; \*  $P < 0.05$ .



**Table S11.** The comparison of gene methylation level and expression level in endosymbiosis-related genes and other genes, related to Figure 7.

|                               | Gene   | Gene methylation level | 6mA amount | 6mA ratio (%) | Copy number | 6mA amount/copy number | 6mA ratio/copy number (%) | RPKM   | Phylostratum level |
|-------------------------------|--------|------------------------|------------|---------------|-------------|------------------------|---------------------------|--------|--------------------|
| Cation channel family protein | g2947  | 0                      | 0          | 0             | 3.05        | 0.00                   | 0.00                      | 8.09   | 1                  |
| Cation channel family protein | g5937  | 0                      | 0          | 0             | 1.89        | 0.00                   | 0.00                      | 0.79   | 2                  |
| Cation channel family protein | g5938  | 0                      | 0          | 0             | 1.88        | 0.00                   | 0.00                      | 1.28   | 1                  |
| Cation channel family protein | g5940  | 7.6                    | 9          | 2.30          | 2.02        | 4.46                   | 1.14                      | 3.47   | 1                  |
| Cation channel family protein | g6962  | 5                      | 6          | 1.19          | 3.31        | 1.81                   | 0.36                      | 13.22  | 9                  |
| Cation channel family protein | g6963  | 0                      | 0          | 0             | 4.11        | 0.00                   | 0.00                      | 2.88   | 1                  |
| Cation channel family protein | g6964  | 0                      | 0          | 0             | 5.94        | 0.00                   | 0.00                      | 0.99   | 1                  |
| globin                        | g1045  | 8.87                   | 14         | 5.28          | 7.67        | 1.83                   | 0.69                      | 483.46 | 1                  |
| MATE family                   | g5951  | 0                      | 0          | 0             | 4.87        | 0.00                   | 0.00                      | 203.88 | 1                  |
| MATE family                   | g17276 | 3.07                   | 4          | 0.44          | 10.20       | 0.39                   | 0.04                      | 42.13  | 1                  |
| MATE family                   | g17549 | 13.93                  | 18         | 3.73          | 5.20        | 3.46                   | 0.72                      | 22.98  | 1                  |
| mean of other genes           | -      | 16.75                  | 13.79      | 1.93          | 4.54        | 7.14                   | 0.99                      | 12.43  | -                  |

**Table S12.** Comparison of gene annotation in *Paramecium bursaria*, related to Figure 1.

|                                 | This study | He et al., 2019 |
|---------------------------------|------------|-----------------|
| Gene number                     | 17,825     | 17,266          |
| Overlapped gene                 | -          | 4,472           |
| Number of genes longer than 1kb | 8,220      | 7,654           |

**Table S13.** The NCBI GI number of MT-A70 family proteins used for phylogenetic tree construction, related to Figure 5.

|               |                                  | AMT1                    | AMT2/5                                        | AMT3                   | AMT4                    | AMT6/7                   | DAMT1      |
|---------------|----------------------------------|-------------------------|-----------------------------------------------|------------------------|-------------------------|--------------------------|------------|
| Rhizaria      | <i>Reticulomyxa filosa</i>       | 569355952               |                                               |                        |                         | 569429466                |            |
|               | <i>Blastocystis hominis</i>      | 300122443               |                                               |                        |                         | 300121574                |            |
| Stramenopiles | <i>Plasmodium falciparum</i>     |                         |                                               | 906521926              | 910273602               |                          |            |
|               | <i>Oxytricha trifallax</i>       | 403359546<br>403376498  | 403348598                                     |                        |                         | 403331225<br>403366155   |            |
| Apicomplexa   | <i>Tetrahymena thermophila</i>   | 586728217               | 586735011<br>586734668                        | 89304141               | 586734236               | 586743342<br>586727895   |            |
|               | <i>Paramecium tetraurelia</i>    | 145476411<br>145544559  | 74830621<br>145473723<br>74830631<br>74830636 | 145499669<br>145492063 | 74830646<br>145534770   | 145487402<br>145546436   |            |
|               | <i>Chlamydomonas reinhardtii</i> | 159474530<br>1335048048 |                                               | 1335054311             | 159466562<br>1335048210 | 159480906<br>1335043186  |            |
| Algae         | <i>Arabidopsis thaliana</i>      |                         |                                               | 4539001                | 73620975                |                          | 18394726   |
|               | <i>Physcomitrella patens</i>     |                         |                                               | 1373907462             | 1333491572              |                          | 1373923975 |
| Plants        | <i>Acanthamoeba castellanii</i>  | 440792815               | 440802961                                     |                        |                         | 440791284<br>440794060   |            |
|               | <i>Anaeromyces robustus</i>      | 1183359562              |                                               |                        |                         | 1183358173               |            |
| Ameoba        | <i>Absidia repens</i>            | 1183482424              |                                               |                        |                         | 1183497549<br>1183498450 | 1183491450 |
|               | <i>Saccharomyces cerevisiae</i>  |                         |                                               | 1023945599 (KAR4)      | 1322815 (IME4)          |                          |            |
| Basal fungi   | <i>Drosophila melanogaster</i>   |                         |                                               | 74869774               | 33301422                |                          | 24647514   |
|               | <i>Caenorhabditis elegans</i>    |                         |                                               |                        |                         |                          | 74962031   |
| True fungi    | <i>Danio rerio</i>               |                         |                                               | 82186021               | 45501238                |                          | 189522093  |
|               | <i>Homo sapiens</i>              |                         |                                               | 24308265               | 21361827                |                          | 84040265   |
|               |                                  |                         |                                               |                        |                         |                          |            |

**Table S14.** Primers used for RT-PCR and qRT-PCR verification on the *PbAMT1* gene, related to Figure 5-6.

| Primers       | Sequences (5' to 3')     |
|---------------|--------------------------|
| PbAMT1_f3669  | CCGAATATTTCCAAATAATGCC   |
| PbAMT1_r3890  | GGCGTCAAGGTATGATCAATAG   |
| PbAMT1_r4079  | CATATGGTAATATTATATTC     |
| PbAMT1_f4112  | GGGCATTTTACTTATCATATCG   |
| PbAMT1_r4392  | CAACGATATCTCTAGGAGTGC    |
| PbAMT1_f42017 | GCACTCCTAGAGATATCGTTG    |
| PbAMT1_r41758 | ATAGGAAGGATGAGGATTAG     |
| PbAMT1_f42770 | CAATTCATTTCCCTATTGTAACCC |
| PbAMT1_f42231 | GCAACACCTCTAGATGGTTATG   |
| PbAMT1_r42363 | GGTAACTTGCAAGCTAATGG     |
| PbAMT1_5prime | ATGATCTCAAACAAAAGGG      |
| PbAMT1_3prime | TCACAATTCATTTCCCTATTG    |
| GAPDH_f181    | CCATGGGGAGATTCAGGAG      |
| GAPDH_r411    | GCATGAAGCATTACTGATTATG   |
| PbAMT1_f3797  | GAAGATAACATCACTCGCTACCG  |
| PbAMT1_r4009  | GGAAAATTGGGGATATAAAAATTG |

**Table S15.** Primers used for the qPCR verification coupled with *DpnI/DpnII* digestion, related to Figure 3.

| Primers           | Sequences (5' to 3')    | Site name | RNA polymerases |
|-------------------|-------------------------|-----------|-----------------|
| Contig6:85,913f   | CATATTAATGCATTGAATCC    | H1        | Pol II          |
| Contig6:86,112r   | TAATGAGAAGTTTTGTGAGAAGG |           |                 |
| Contig8:43,720f   | TGGCCGTCAGCACTCCAAGC    | H2        | Pol II          |
| Contig8:43,919r   | AGAAATAAACCAAGACCCATTG  |           |                 |
| Contig11:149,430f | GCGGGAAGTGGCTAAGGC      | H4        | Pol II          |
| Contig11:149,629r | CTCAACAATTTTATTCTTTC    |           |                 |
| Contig2:42,783f   | GATGGCTAATTATTAAG       | I1        | Pol II          |
| Contig2:42,982r   | AATAAATATGATACTTAAAGG   |           |                 |
| Contig3:85,336f   | AATACATTCTATCCTTCTGG    | I2        | Pol II          |
| Contig3:85,535r   | ATTTATTATATTAATGTTAT    |           |                 |
| Contig10:2,631f   | TTATCTAATATCTGTCAATTCG  | I3        | Pol II          |
| Contig10:2,830r   | TCATTTGTAACAAAAGAG      |           |                 |
| Contig5:84,965f   | ATCGAATAGACTAAAATCTGC   | N1        | Pol II          |
| Contig5:85,164r   | CATTAGCTATGAAAATTGTTG   |           |                 |
| Contig6:46,670f   | GAAAAATGAGTTAAAAC       | N6        | Pol II          |
| Contig6:46,869r   | TAGTATCGTACCATCGTTAC    |           |                 |
| Contig11:85,251f  | GGAACTCATTTTAATTCAGG    | N7        | Pol II          |
| Contig11:85,450r  | GAGCTGCTACACTATTATCTC   |           |                 |
| Contig380:3,095f  | GAAGTAGTCACATTTAATGTG   | N3        | Pol I           |
| Contig380:3,294r  | ATTAACATTTTGAGCTGTTGCC  |           |                 |
| Contig72:156,482f | TCGGCCATACTAAACC        | N4        | Pol III         |

**Table S16.** Detailed information of alternative splicing analysis and 6mA-IP, related to Figure 6.

| Sites | ONT                        | RNA-seq-1                  | RNA-seq-2                  |  |  | 6mA sites' number |
|-------|----------------------------|----------------------------|----------------------------|--|--|-------------------|
|       | Intron retention (WT/RNAi) | Intron retention (WT/RNAi) | Intron retention (WT/RNAi) |  |  |                   |
| IR-1  | Y/N (4/29 vs. 0/19)        | Y/Y                        | Y/Y                        |  |  | 8                 |
| IR-2  | Y/Y (5/32 vs. 1/25)        | Y/Y                        | Y/Y                        |  |  | 2                 |
| IR-3  | Y/Y (7/9 vs. 5/8)          | Y/Y                        | Y/Y                        |  |  | 3                 |

  

| (WT/RNAi)            | WT*                            | WT-1 | WT-2 | RNAi-1 | RNAi-2 |
|----------------------|--------------------------------|------|------|--------|--------|
| Total events' number | 825                            | 887  | 736  | 631    | 550    |
| AE                   | 65                             | 225  | 182  | 146    | 127    |
| ES                   | 8                              | 14   | 14   | 13     | 11     |
| IR                   | 752 (ONT: WT 689 vs. RNAi 609) | 648  | 540  | 472    | 412    |

WT\*: RNA-seq data from He et al., 2019.
